# Supplementary material for: Trimester-Specific Reference Ranges for Saturated, Monounsaturated and Polyunsaturated Fatty Acids in Serum of Pregnant Women: A Cohort Study from the ECLIPSES Group
Source: MDPI journal article supplement (doi:10.3390/nu13114037), 2021-11-12
Supplement: s1 [file s1]

**Supplementary Table S1.** Pearson correlations between absolute (μmol/L) and relative (% of total FAs) concentration of fatty acids in serum.

| Fatty acids                 |              | First trimester (T1)                        |                   | Third trimester (T3)                        |        |
|-----------------------------|--------------|---------------------------------------------|-------------------|---------------------------------------------|--------|
|                             |              | Between absolute and relative concentration |                   | Between absolute and relative concentration |        |
|                             |              | <i>r</i>                                    | <i>p-values</i> * |                                             |        |
| <b>SFA</b>                  |              |                                             |                   |                                             |        |
| Lauric acid (C12:0)         | n= 471 – 472 | 0.254                                       | < 0.001           | n= 466 – 470                                | 0.635  |
| Myristic acid (C14:0)       | n= 471 – 472 | 0.454                                       | < 0.001           | n= 472 – 473                                | 0.334  |
| Palmitic acid (C16:0)       | n= 468 – 471 | 0.676                                       | < 0.001           | n= 470 – 475                                | 0.724  |
| Stearic acid (C18:0)        | n= 472 – 475 | -0.41                                       | 0.374             | n= 474 – 475                                | -0.387 |
| Σ Total SFA                 | n= 468 – 470 | 0.541                                       | < 0.001           | n= 468 – 474                                | 0.605  |
| <b>MUFA</b>                 |              |                                             |                   |                                             |        |
| Palmitoleic acid (C16:1n-7) | n= 466 – 475 | 0.108                                       | 0.020             | n= 469 – 472                                | 0.211  |
| Oleic acid (C18:1n-9)       | n= 466 – 474 | 0.084                                       | 0.071             | n= 469 – 471                                | 0.349  |
| Σ Total MUFA                | n= 466 – 475 | -0.007                                      | 0.880             | n= 469 – 472                                | 0.285  |
| <b>n-6 PUFA</b>             |              |                                             |                   |                                             |        |
| LA (C18:2n-6)               | n= 467 – 476 | 0.397                                       | < 0.001           | n= 473 – 474                                | 0.370  |
| DHGLA (C20:3n-6)            | n= 471 – 473 | 0.477                                       | < 0.001           | n= 474                                      | 0.163  |
| AA (C20:4n-6)               | n= 473 – 475 | 0.307                                       | < 0.001           | n= 471 – 473                                | 0.154  |
| Σ Total n-6 PUFA            | n= 469 – 474 | 0.169                                       | < 0.001           | n= 473 – 476                                | 0.206  |
| <b>n-3 PUFA</b>             |              |                                             |                   |                                             |        |
| EPA (C20:5n-3)              | n= 467 – 469 | 0.859                                       | < 0.001           | n= 464                                      | 0.763  |
| DHA (C22:6n-3)              | n= 474 – 475 | 0.306                                       | < 0.001           | n= 472 – 476                                | 0.215  |
| Σ Total n-3 PUFA            | n= 470 – 473 | 0.416                                       | < 0.001           | n= 470 – 475                                | 0.291  |

LA, Linoleic acid; DHGLA, Dihomo-γ-linolenic acid; AA, Arachidonic acid; EPA, Eicosapentaenoic acid; DHA, Docosahexaenoic acid. SFA, saturated fatty acids; MUFA, monounsaturated fatty acids; n-6 PUFA, omega-6 polyunsaturated fatty acid; n-3 PUFA, omega-3 polyunsaturated fatty acid. *r*, Pearson's correlation coefficient; (\*) *p-values* < 0.01 were considered significant.
